# Supplementary material for: Extending the diabetic retinopathy screening interval beyond 1 year: systematic review
Source: PubMed Central journal article supplement — Br J Ophthalmol. 2015 Jan 13;100(1):105–14. doi: 10.1136/bjophthalmol-2014-305938 (PMC4717369; doi:10.1136/bjophthalmol-2014-305938), 2015-01-13
Supplement: bjophthalmol-2014-305938-s3.pdf [file bjophthalmol-2014-305938-s3.pdf]

Appendix 3: Differences in Screening and Grading Protocols for Detecting Diabetic Retinopathy

|                                 | <u>Was Mydriasis used?</u>                         | <u>How many and which retinal fields were taken?</u>                                                                                                | <u>Photographs or digital retinal photographs</u>                                    | <u>Which cameras were used?</u>                                                                                                                         | <u>Were patients tested using slit lamp (biomicroscopy)</u> | <u>What grading protocol was used?</u>                                                                                                                                                                                                                                              | <u>Were screeners and graders trained and/or accredited?</u>                                                           | <u>Was grading quality assured?/ Was grading assessed elsewhere?</u>                     | <u>How many times were images graded?</u> |
|---------------------------------|----------------------------------------------------|-----------------------------------------------------------------------------------------------------------------------------------------------------|--------------------------------------------------------------------------------------|---------------------------------------------------------------------------------------------------------------------------------------------------------|-------------------------------------------------------------|-------------------------------------------------------------------------------------------------------------------------------------------------------------------------------------------------------------------------------------------------------------------------------------|------------------------------------------------------------------------------------------------------------------------|------------------------------------------------------------------------------------------|-------------------------------------------|
| Agardh, E. and P. Tababat-Khani | No information                                     | One central and one nasal 50° field per eye.                                                                                                        | Red free digital images                                                              | No information                                                                                                                                          | No information                                              | International Diabetic Retinopathy and Macula Edema Severity Scales                                                                                                                                                                                                                 | Performed by specially trained ophthalmic nurses                                                                       | No information                                                                           | No information                            |
| Jones et.al                     | Both pupils were dilated with 1% tropicamide drops | Two photographs of each eye were taken, one centred on the optic nerve and the other on the fovea.<br><br>Images taken by trained retinal screeners | Mixed<br><br>Before 2000: colour transparency film<br><br>From 2000: digital imaging | Mobile retinal cameras: Canon 45NM or 46NM fundus cameras (Canon UK, Reigate, U.K.) with 458 fields and Orion Eyecap and DRSS digital imaging software. | No information                                              | 1990 to 2002: Descriptive grading system based on European guidelines<br><br>From 2003: U.K. National Screening Committee grading system<br><br>After 2006: NSC grading system<br><br>Described as 'virtually identical'                                                            | Before 2000: diabetologist with a specialist interest in retinopathy (R.H.G.).<br><br>From 2000: seven primary graders | Yes. Nationally accredited arbitration grader                                            | No information                            |
| Kohner et.al                    | Yes                                                | Four-field 30° retinal photographs taken as stereo pairs                                                                                            | No information                                                                       | No information                                                                                                                                          | No information                                              | Allocated to a retinopathy severity level using the Early Treatment of Diabetic Retinopathy Study (ETDRS) final scale, modified for four standard fields.<br><br>Retinopathy severity categorised as no retinopathy, MA only in one eye, MA in both eyes or more severe retinopathy | No information                                                                                                         | Only patients with a set of good quality images of both eyes were included in the study. | No information                            |

|                            |                                                |                                                                                                    |                                                                                   |                      |                                                                                               |                                                                                                                                                                                                          |                                                                                           |                                                                                                                        |                                                  |
|----------------------------|------------------------------------------------|----------------------------------------------------------------------------------------------------|-----------------------------------------------------------------------------------|----------------------|-----------------------------------------------------------------------------------------------|----------------------------------------------------------------------------------------------------------------------------------------------------------------------------------------------------------|-------------------------------------------------------------------------------------------|------------------------------------------------------------------------------------------------------------------------|--------------------------------------------------|
|                            |                                                |                                                                                                    |                                                                                   |                      |                                                                                               | features.                                                                                                                                                                                                |                                                                                           |                                                                                                                        |                                                  |
| Kristinsson, J. K., et al. | Yes                                            | No information                                                                                     | No information                                                                    | No information       | Yes                                                                                           | No information                                                                                                                                                                                           | No information                                                                            | No information                                                                                                         | No information                                   |
| Looker et al.              | If required                                    | Single field                                                                                       | Digital photograph                                                                | No information       | Slit lamp outcomes were not available for all patients, but were available results were used. | Scottish grading system                                                                                                                                                                                  | No information                                                                            | No information                                                                                                         | No information                                   |
| Maguire et.al              | Yes – 1% cyclopentolate and 2.5% phenylephrine | Stereoscopic fundal photography of seven fields. Non simultaneous photographic pairs for each eye  | Viewed with a Donaldson Stereoviewer providing a 3D representation of the fundus. | Topcon fundus camera | Yes. Slit lamp examination of the anterior segment.                                           | Early Treatment Diabetic Retinopathy Study adaption of the modified Ailie House classification of diabetic retinopathy.                                                                                  | Graded by an ophthalmologist with a large sample graded by a second grader independently. | When necessary, a grading supervisor was used to adjudicate. Agreement between two graders was statistically assessed. | No information                                   |
| Misra et.al                | AS JONES et al                                 |                                                                                                    |                                                                                   |                      |                                                                                               |                                                                                                                                                                                                          |                                                                                           |                                                                                                                        |                                                  |
| Ólafsdóttir et.al          | Yes                                            |                                                                                                    | Colour photographs taken with a 90-diopter lens                                   |                      | Yes                                                                                           | Visual acuity reported by the better eye.<br><br>Retinopathy level determined as the stage of the worse eye.<br><br>Visual acuity measured on a snellen chart at 6 m with the best refractive correction | Screened by an ophthalmologist                                                            |                                                                                                                        |                                                  |
| Soto-Pedre et al.          | No Information                                 | One fundus photograph centred on the macula of each eye taken with 45° nonmydriatic retinal camera | Instant film Polaroid                                                             | Canon CR4-45NM       | No                                                                                            | International Diabetic Retinopathy and Macula Edema Severity Scales.<br><br>Level of disease recorded for the worse eye.                                                                                 | Stored polaroid photographs were graded by the same retina specialist for this study.     | No                                                                                                                     | Once for the purpose of this retrospective study |
| Stratton et al.            | Yes                                            | Two standard 45 fields – Macular and                                                               | Digital colour retinal                                                            | No information       | No information                                                                                | Grading based on the Early Treatment                                                                                                                                                                     | Trained assessors in a central location to                                                | Internal and external quality                                                                                          | No information                                   |

|                      |                                                               |                                                                                        |                                                                                                 |                |                                                                                                                        |                                                                                                                                                                                      |                                                                                                                            |                                                                |                                                                    |
|----------------------|---------------------------------------------------------------|----------------------------------------------------------------------------------------|-------------------------------------------------------------------------------------------------|----------------|------------------------------------------------------------------------------------------------------------------------|--------------------------------------------------------------------------------------------------------------------------------------------------------------------------------------|----------------------------------------------------------------------------------------------------------------------------|----------------------------------------------------------------|--------------------------------------------------------------------|
|                      |                                                               | disc centred - per eye                                                                 | photographs                                                                                     |                |                                                                                                                        | of Diabetic Retinopathy Study (ETDRS) severity scale<br><br>Background retinopathy defined using the R1M0 category on the English NHS Diabetic Eye Screening Programme.              | the screening venues                                                                                                       | assured reading process that reaches national recommendations. |                                                                    |
| Thomas et.al         | Tropicamide (applied to each eye 15 minutes before screening) | Two 45 degree digital retinal images per eye - one macular centred and one nasal field | Non-mydriatic Canon DGi camera                                                                  |                |                                                                                                                        | Screening undertaken by a trained photographer<br><br>Grading undertaken by trained staff use an enriched version of English National Screening Protocol                             | Before screening, a trained healthcare assistant assesses visual acuity in both eyes using an illuminated 3m Snellen chart |                                                                | Retinal images transferred to a central reading centre for grading |
| Younis et.al 2003a   | 1% tropicamide with or without phenylephrine                  | Three overlapping non-stereoscopic 33mm transparency photographs of each eye           | Either Canon CR4-45NM with 45 degree fields or a Topcon TRC 50 SX camera with 50 degree fields. | No information | Patients with ungradable images or STDR invited for slit lamp biomicroscopy by specialists in medical retinal disease. | STDR defined as moderate pre-proliferative retinopathy or greater and / or significant maculopathy in any eye.<br><br>Graded by trained graders with a Modified Wisconsin algorithm. | No information                                                                                                             | No information                                                 | No information                                                     |
| Younis, et al. 2003b | As Younis 2003b                                               |                                                                                        |                                                                                                 |                |                                                                                                                        |                                                                                                                                                                                      |                                                                                                                            |                                                                |                                                                    |
