# Supplementary material for: Extending the diabetic retinopathy screening interval beyond 1 year: systematic review
Source: PubMed Central journal article supplement — Br J Ophthalmol. 2015 Jan 13;100(1):105–14. doi: 10.1136/bjophthalmol-2014-305938 (PMC4717369; doi:10.1136/bjophthalmol-2014-305938), 2015-01-13
Supplement: bjophthalmol-2014-305938-s5.pdf [file bjophthalmol-2014-305938-s5.pdf]

|    |                                                                                                                                   |     |     |     |     |     |     |    |    |   |
|----|-----------------------------------------------------------------------------------------------------------------------------------|-----|-----|-----|-----|-----|-----|----|----|---|
| 23 | Have the methods and assumptions used to extrapolate short-term results to final outcomes been documented and justified?          | Y   | Y   | Y   | Y   | Y   | Y   | Y  | Y  | Y |
| 24 | Are the costs incorporated into the model justified?                                                                              | Y   | Y   | Y   | Y   | Y   | Y   | Y  | Y  | Y |
| 25 | Has the source for all costs been described?                                                                                      | Y   | Y   | Y   | Y   | Y   | Y   | Y  | Y  | Y |
| 26 | Have discount rates been described and justified given the target decision maker?                                                 | Y   | N   | Y   | N   | Y   | Y   | Y  | Y  | Y |
| 27 | Are the utilities incorporated into the model appropriate?                                                                        | N/A | N/A | N/A | N/A | N/A | N/A | Y  | Y  | Y |
| 28 | Is the source of utility weights referenced?                                                                                      | N/A | N/A | N/A | N/A | N/A | N/A | Y* | Y* | Y |
| 29 | If data have been incorporated as distributions, has the choice of distributions for each parameter been described and justified? | N/A | N/A | N/A | N   | N/A | N/A | Y  | N  | N |
| 30 | If data are incorporated as point estimates, are the ranges used for sensitivity analysis stated clearly and justified?           | N   | N   | N   | N   | N   | N   | Y  | Y* | Y |
| 31 | Has heterogeneity been dealt with by running the model separately for different sub-groups?                                       | Y   | Y   | Y   | N   | N   | N   | N  | N  | N |
| 32 | Have the results been compared with those of previous models and any differences in results explained?                            | Y   | Y   | Y   | Y   | Y   | Y   | Y  | Y  | Y |

Key: Y = yes, No = no, UN = unclear, N/A = not applicable and \* = partially completed
